# Supplementary material
Source: PubMed Central journal article supplement (PMC4106997)

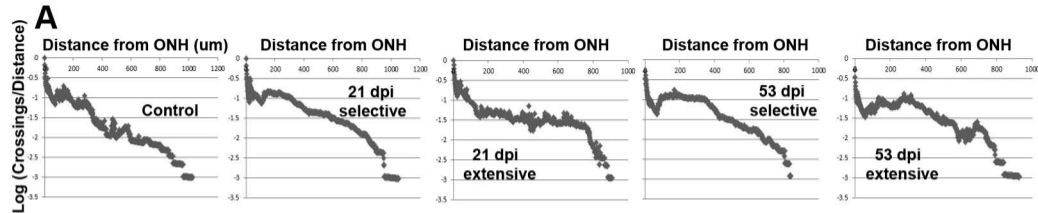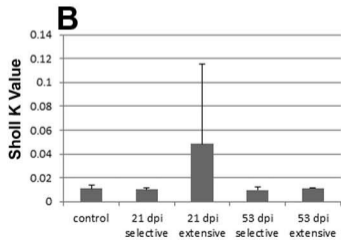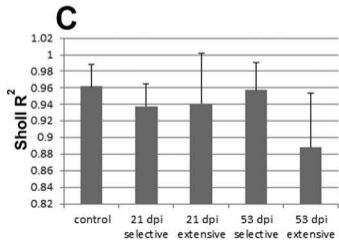

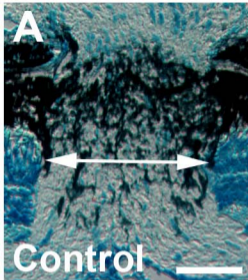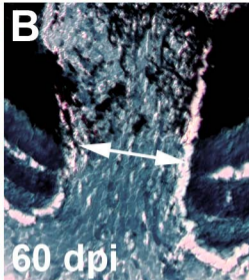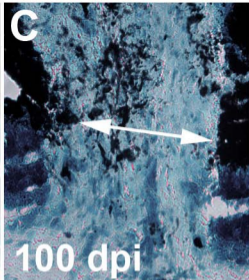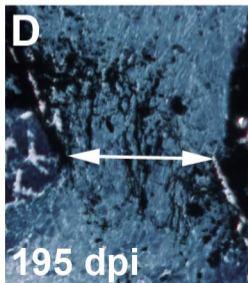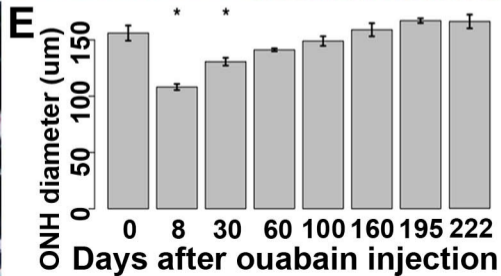

Supplement: NIHMS612144-supplement-Supp_FigureS1-S3.pdf [file NIHMS612144-supplement-Supp_FigureS1-S3.pdf]
